# Supplementary material for: The effect of vacancy defects on the electromechanical properties of monolayer NiTe2 from first principles calculations
Source: Royal Society of Chemistry journal article supplement (doi:10.1039/d2cp05102h), 2022-01-01
Supplement: d2cp05102h19.pdf [file d2cp05102h19.pdf]

## Supplementary Data

### Effect of vacancy defects on the electromechanical properties of monolayer NiTe<sub>2</sub> monolayers from first principles

K. H. Yeoh<sup>1,2</sup>, K. -H. Chew<sup>3,4</sup>, Y.H.R. Chang<sup>5</sup>, T. L. Yoon<sup>6</sup>, and D. S. Ong<sup>7</sup>

<sup>1</sup>Department of Electrical and Electronic Engineering, Lee Kong Chian Faculty of Engineering and Science, Universiti Tunku Abdul Rahman, 43000 Kajang, Selangor, Malaysia.

<sup>2</sup>Center for Photonics and Advanced Material Research, Lee Kong Chian Faculty of Engineering and Science, Universiti Tunku Abdul Rahman, 43000 Kajang, Selangor, Malaysia

<sup>3</sup>Zhejiang Expo New Materials Co. Ltd., 1066, Xincheng Times Avenue, Longgang, Wenzhou 325802, China.

<sup>4</sup>Key Laboratory of Optical Field Manipulation of Zhejiang Province, Department of Physics, Zhejiang Sci-Tech University, Hangzhou 310018, China.

<sup>5</sup>Faculty of Applied Sciences, Universiti Teknologi MARA, Cawangan Sarawak, 94300 Samarahan, Sarawak

<sup>6</sup>School of Physics, Universiti Sains Malaysia, 11800 USM, Penang, Malaysia

<sup>7</sup>Faculty of Engineering, Multimedia University, Persiaran Multimedia, 63100 Cyberjaya, Selangor, Malaysia.

<sup>a)</sup> Author to whom correspondence should be addressed. Electronic mail: [khyeoh@utar.edu.my](mailto:khyeoh@utar.edu.my),  
[keathoe.yeoh@gmail.com](mailto:keathoe.yeoh@gmail.com), [robincyh@uitm.edu.my](mailto:robincyh@uitm.edu.my)

## Optimized structural coordinates of pristine monolayer 1T-NiTe<sub>2</sub>

CELL PARAMETERS (angstrom)

|              |             |              |
|--------------|-------------|--------------|
| 3.806267222  | 0.000000000 | 0.000000000  |
| -1.903133607 | 3.296320913 | 0.000000000  |
| 0.000000000  | 0.000000000 | 21.000000000 |

ATOMIC POSITIONS (angstrom)

|    |              |              |              |
|----|--------------|--------------|--------------|
| Ni | 0.000000000  | 0.0000322117 | 6.2973831511 |
| Te | 0.0000015671 | 2.1975798630 | 4.9384007687 |
| Te | 1.9031356804 | 1.0988050501 | 7.6565525903 |

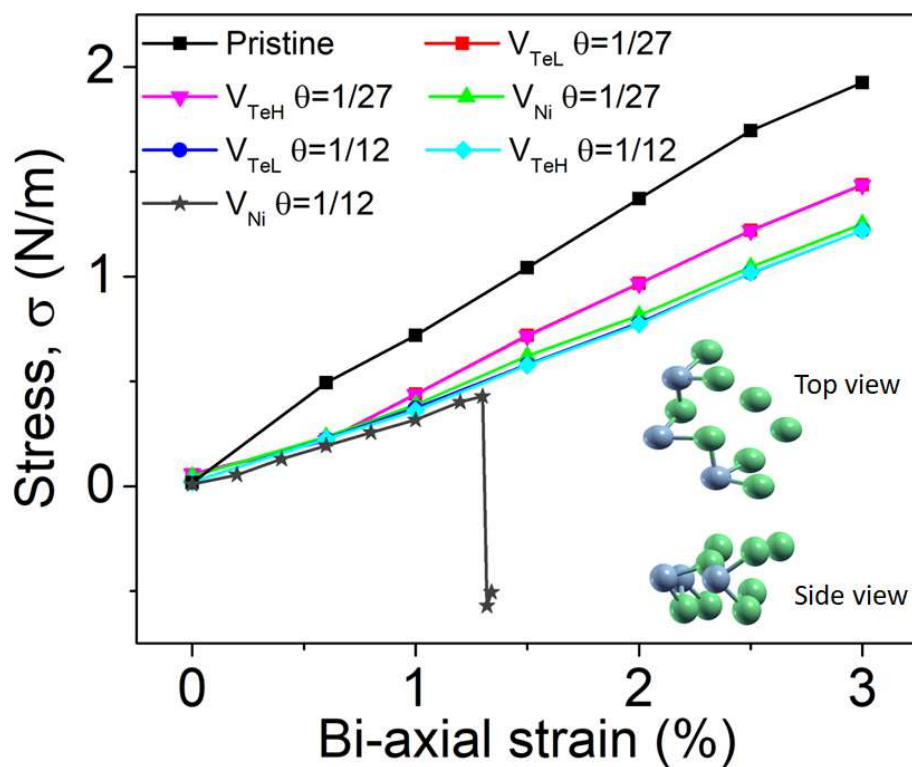

Fig. S1. Stress-strain curve of the pristine 1T-NiTe<sub>2</sub> monolayer and the 1T-NiTe<sub>2</sub> monolayers with Ni or Te vacancies. Inset is the deformed crystal structure of the monolayer 1T-NiTe<sub>2</sub> with  $V_{Ni}$   $\theta=1/12$  under the influence of bi-axial strain of 1.32%.

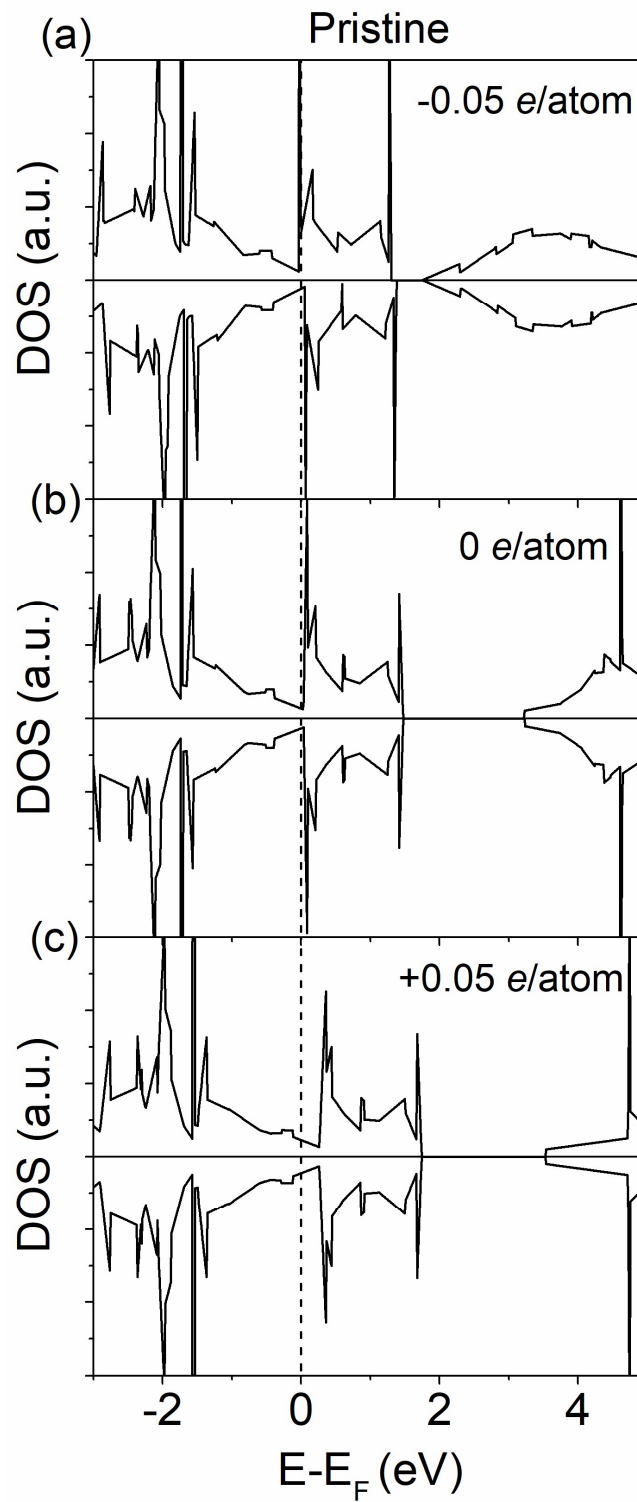

Fig. S1. Density of states (DOS) of pristine monolayer 1T-NiTe<sub>2</sub> for (a)  $q = -0.05 e/\text{atom}$ , (b)  $q = 0 e/\text{atom}$  and (c)  $q = +0.05 e/\text{atom}$ .

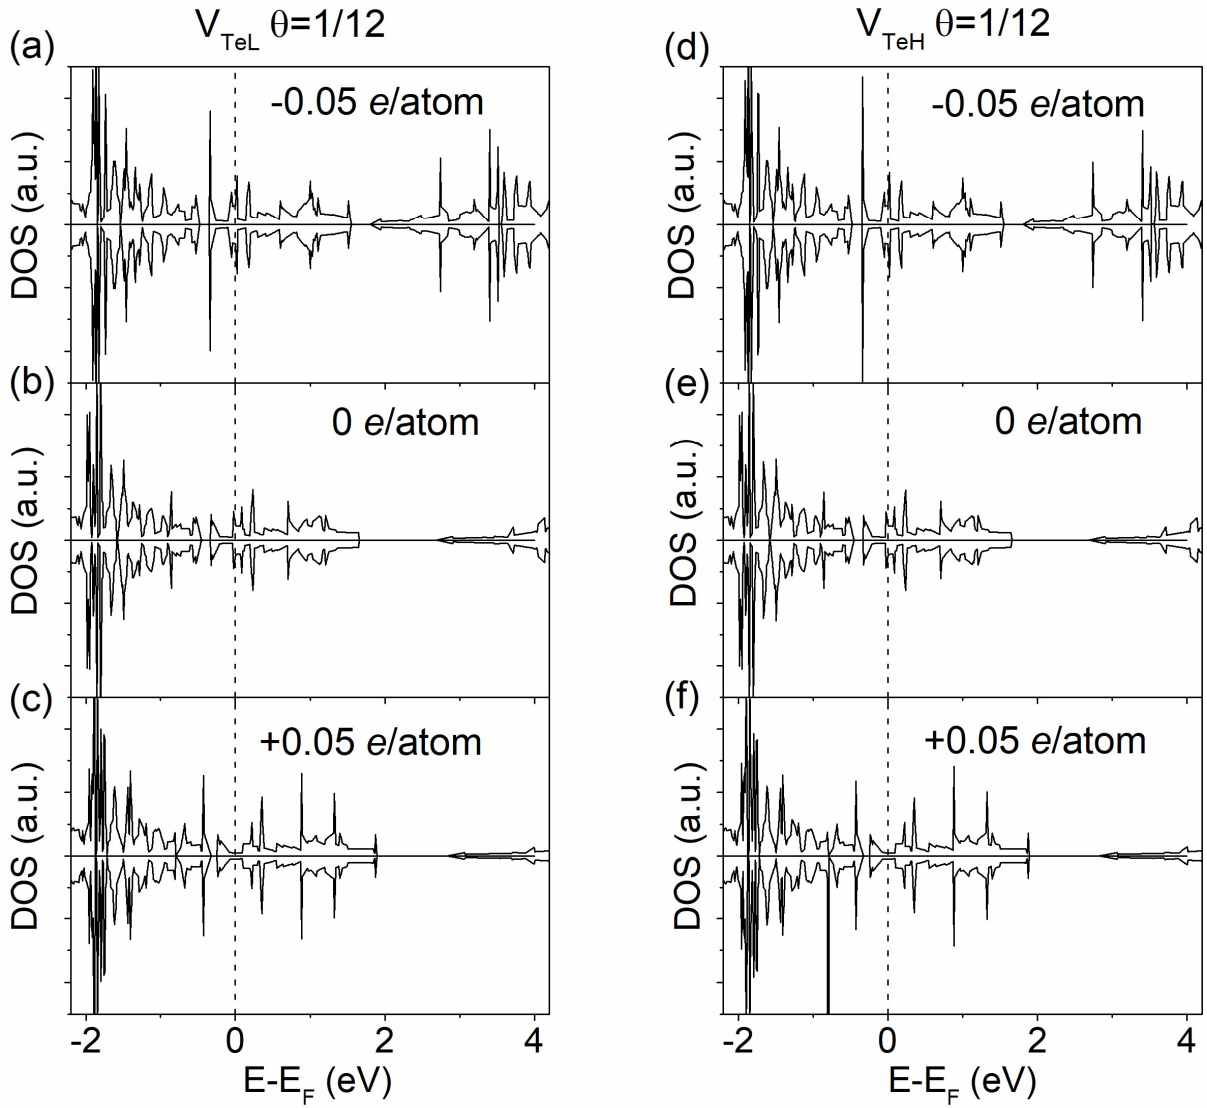

Fig. S3. Density of states (DOS) of the 1T-NiTe<sub>2</sub> monolayer with defects in the form of (a), (b), (c)  $V_{\text{TeL}}$  at  $\theta = 1/12$  and (d), (e), (f)  $V_{\text{TeH}}$  at  $\theta = 1/12$ .

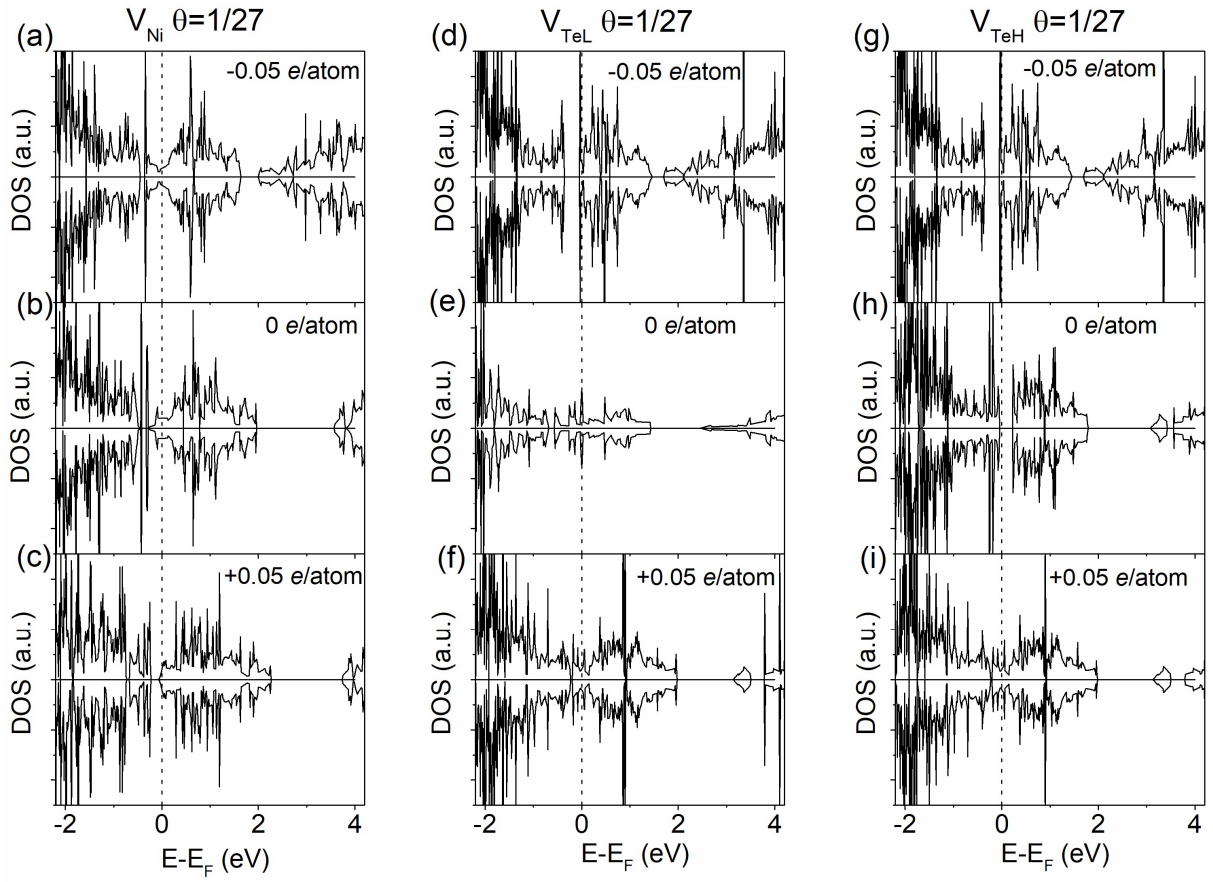

Fig. S4. Density of states (DOS) of the 1T-NiTe<sub>2</sub> monolayer with defects in the form of (a), (b), (c)  $V_{\text{Ni}}$  at  $\theta = 1/27$ , (d), (e), (f)  $V_{\text{TeL}}$  at  $\theta = 1/27$  and (g), (h), (i)  $V_{\text{TeH}}$  at  $\theta = 1/27$

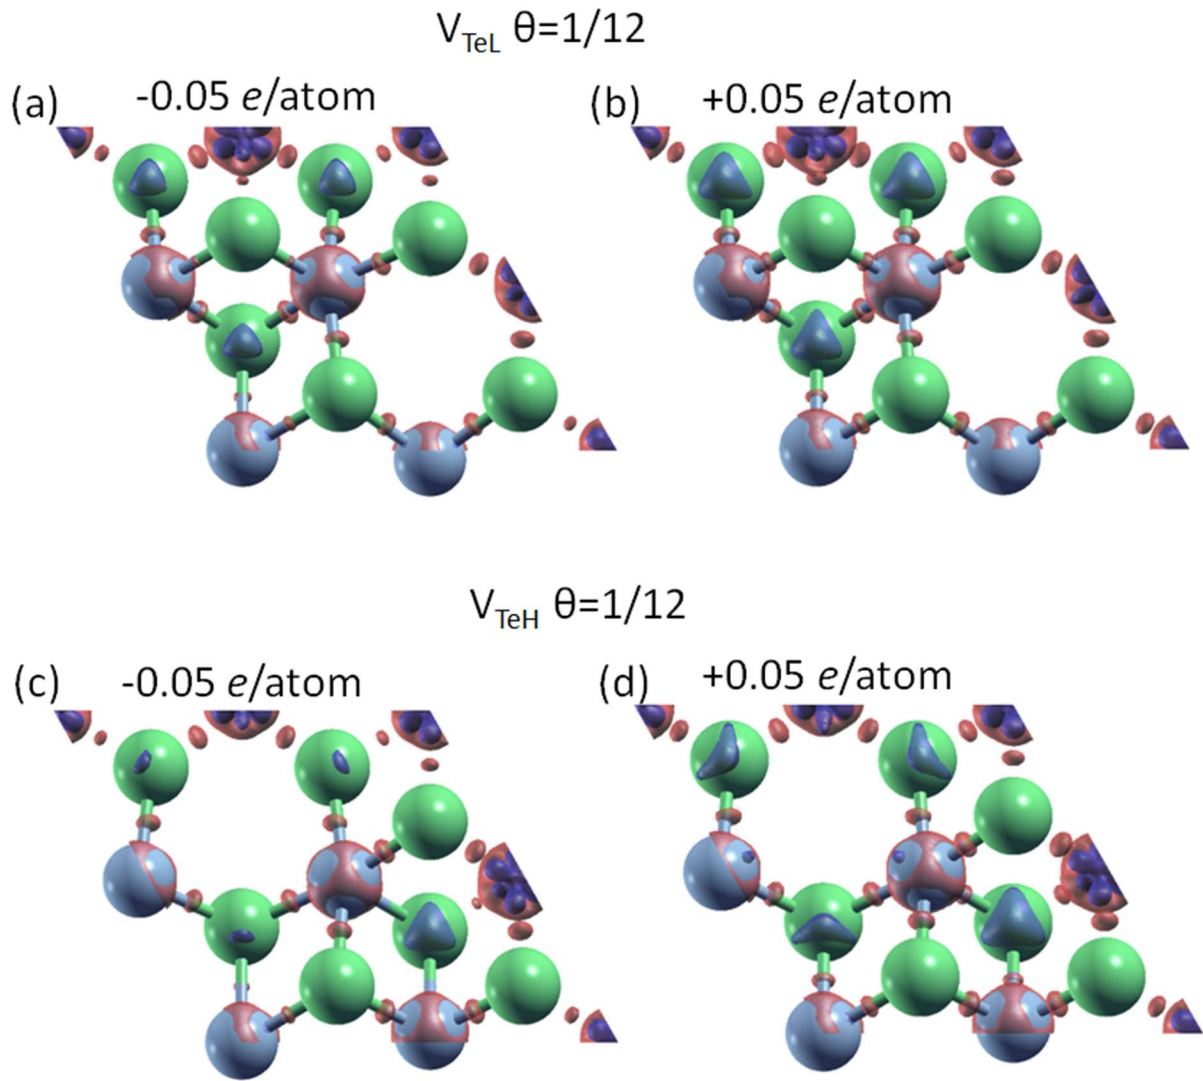

Fig. S5. The charge density difference between the monolayer 1T-NiTe<sub>2</sub> with  $V_{\text{TeL}}$  and  $V_{\text{TeH}}$  at  $\theta = 1/12$  and the superposition of the isolated atomic densities. The charge injection,  $q$  for (a) and (c) is  $-0.05 e/\text{atom}$  and for (b) and (d) is  $+0.05 e/\text{atom}$ . Red (blue) shaded region denotes the electron accumulation (depletion) region. The iso-surface is set at  $0.009 e/\text{bohr}^3$ . The green and bluish balls represent Te and Ni atoms, respectively.

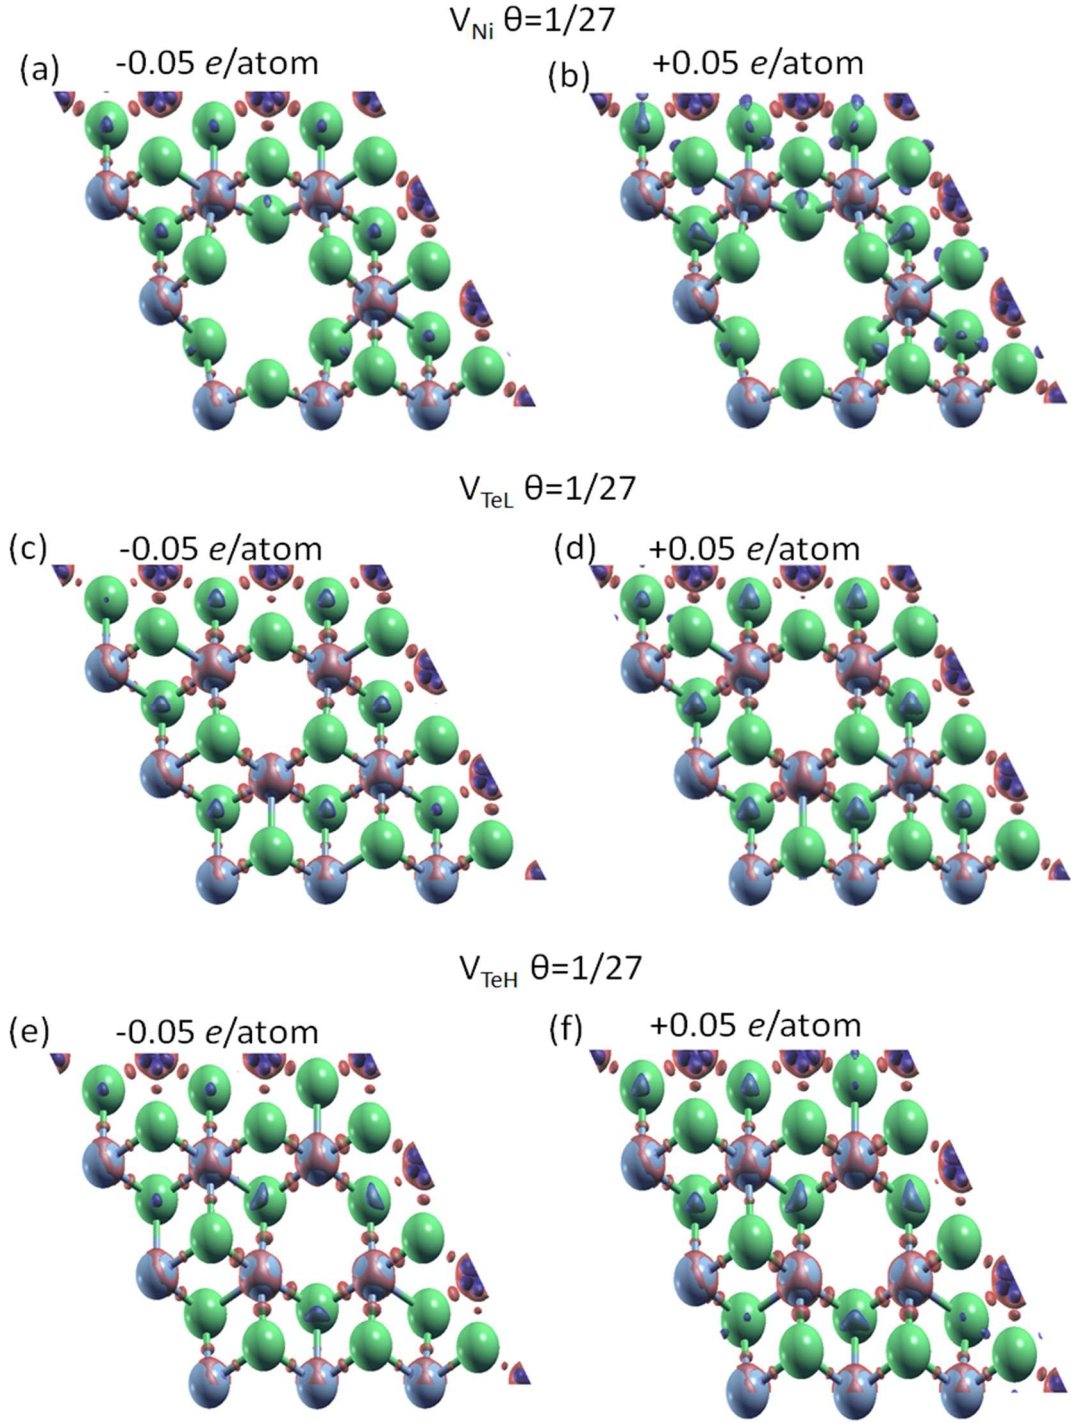

Fig. S6. The charge density difference between the monolayer 1T-NiTe<sub>2</sub> with  $V_{\text{Ni}}$ ,  $V_{\text{TeL}}$  and  $V_{\text{TeH}}$  at  $\theta = 1/27$  and the superposition of the isolated atomic densities. The charge injection,  $q$  for (a), (c) and (e) is  $-0.05 e/\text{atom}$  and for (b), (d), (f) is  $+0.05 e/\text{atom}$ . Red (blue) shaded region denotes the electron accumulation (depletion) region. The iso-surface is set at  $0.009 e/\text{bohr}^3$ . The green and bluish balls represent Te and Ni atoms, respectively.

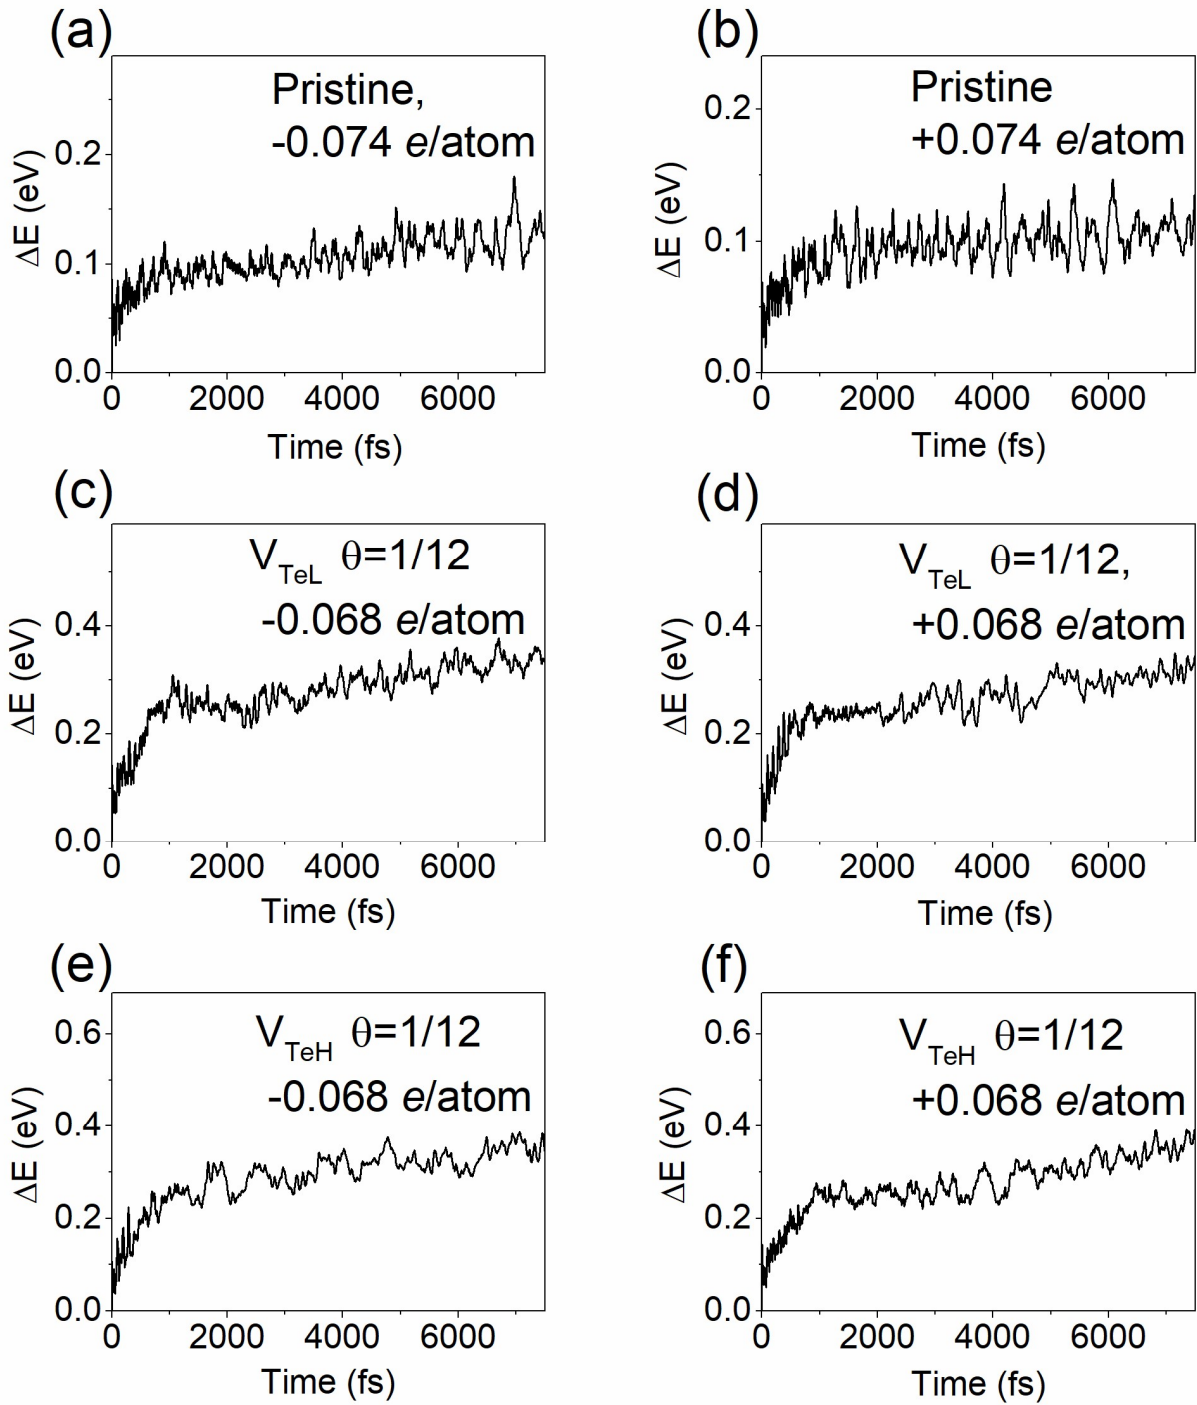

Fig. S7. Fluctuation of energy under AIMD simulations at 500 K for (a), (b) pristine monolayer 1T-NiTe<sub>2</sub>, monolayer 1T-NiTe<sub>2</sub> with (c), (d)  $V_{\text{TeL}}$  at  $\theta = 1/12$  (e), (f)  $V_{\text{TeH}}$  at  $\theta = 1/12$ . The evolution of the NiTe<sub>2</sub> crystal structures as a function of simulation time are provided in the movie clips



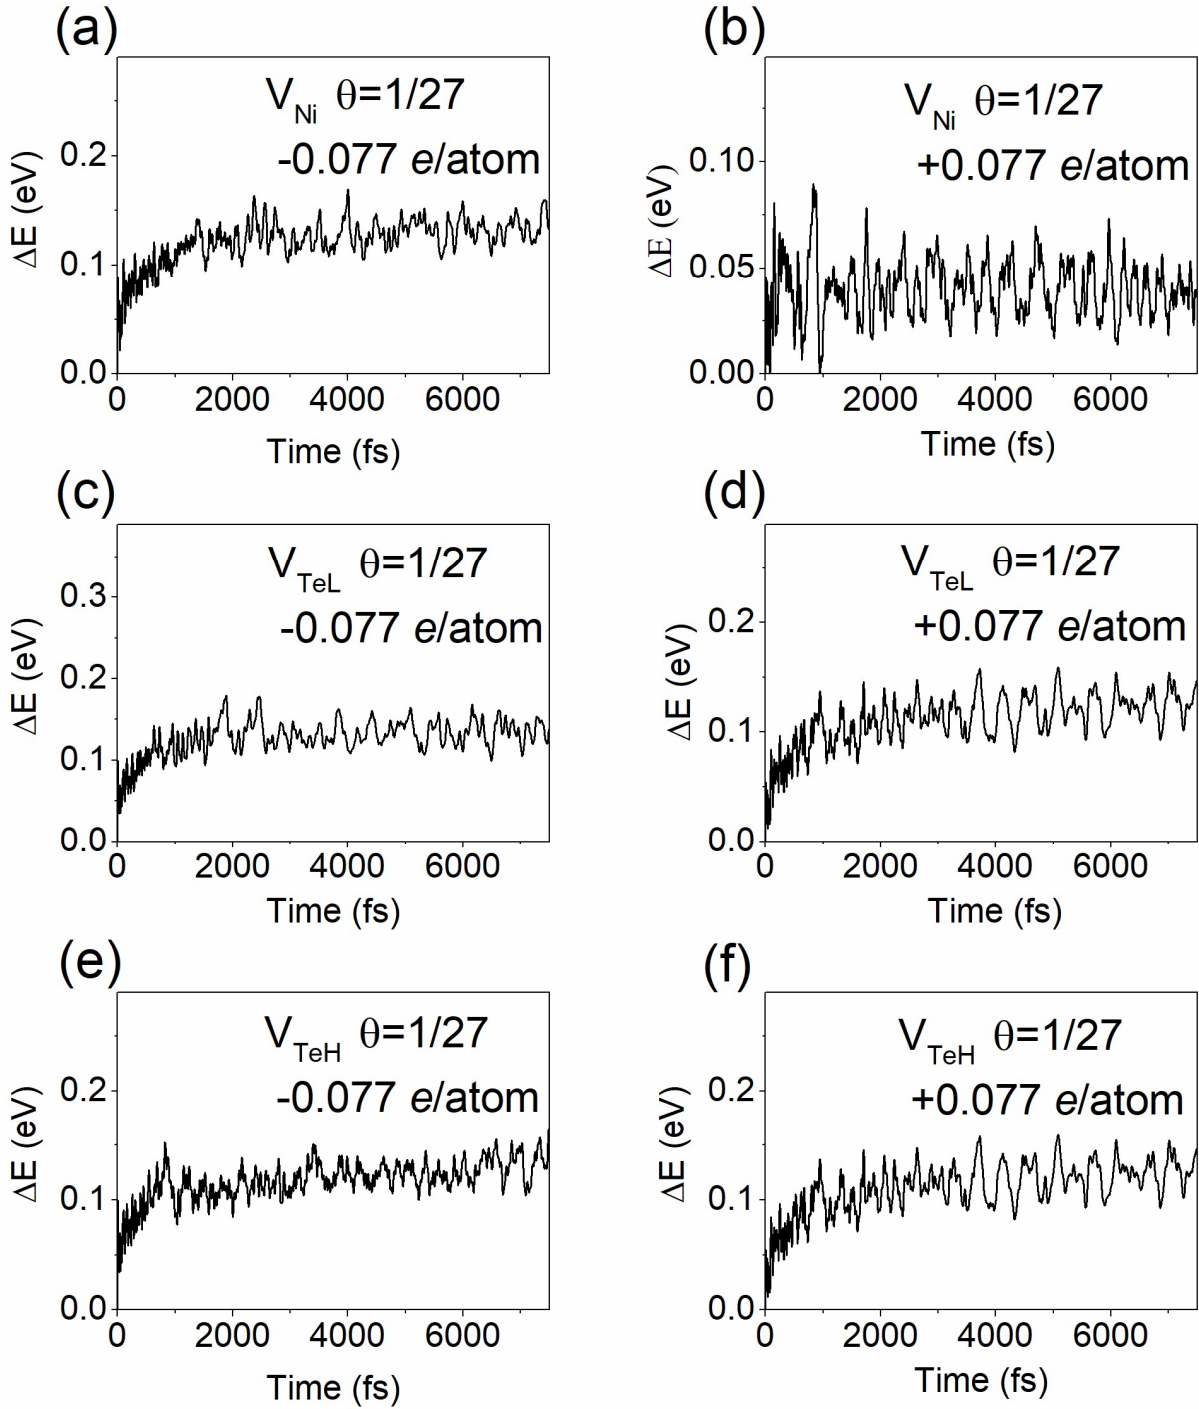

Fig. S8. Fluctuation of energy under AIMD simulations at 500 K for the monolayer 1T-NiTe<sub>2</sub> with (a), (b)  $V_{\text{Ni}}$  at  $\theta = 1/27$ , (c), (d)  $V_{\text{TeL}}$  at  $\theta = 1/27$  and (e), (f)  $V_{\text{TeH}}$  at  $\theta = 1/27$ . The evolution of the NiTe<sub>2</sub> crystal structures as a function of simulation time are provided in the movie clips.

Table S1: Description of the movie clips provided in the Supplementary Data. These movie clips show the evolution of the NiTe<sub>2</sub> crystal structures as a function of AIMD simulation time at T=500K.

| No. | File name        | Description                                                                                  |
|-----|------------------|----------------------------------------------------------------------------------------------|
| 1   | Pristine.mpg     | Pristine monolayer 1T-NiTe <sub>2</sub> , $q = 0$ e/atom                                     |
| 2   | Pristine-min.mpg | Pristine monolayer 1T-NiTe <sub>2</sub> , $q = -0.074$ e/atom                                |
| 3   | Pristine-max.mpg | Pristine monolayer 1T-NiTe <sub>2</sub> , $q = +0.074$ e/atom                                |
| 4   | 2VTeL.mpg        | Monolayer 1T-NiTe <sub>2</sub> with V <sub>TeL</sub> , $\theta = 1/12$ , $q = 0$ e/atom      |
| 5   | 2VTeL-min.mpg    | Monolayer 1T-NiTe <sub>2</sub> with V <sub>TeL</sub> , $\theta = 1/12$ , $q = -0.068$ e/atom |
| 6   | 2VTeL-max.mpg    | Monolayer 1T-NiTe <sub>2</sub> with V <sub>TeL</sub> , $\theta = 1/12$ , $q = +0.068$ e/atom |
| 7   | 2VTeH.mpg        | Monolayer 1T-NiTe <sub>2</sub> with V <sub>TeH</sub> , $\theta = 1/12$ , $q = 0$ e/atom      |
| 8   | 2VTeH-min.mpg    | Monolayer 1T-NiTe <sub>2</sub> with V <sub>TeH</sub> , $\theta = 1/12$ , $q = -0.068$ e/atom |
| 9   | 2VTeH-max.mpg    | Monolayer 1T-NiTe <sub>2</sub> with V <sub>TeH</sub> , $\theta = 1/12$ , $q = +0.068$ e/atom |
| 10  | 3VNi.mpg         | Monolayer 1T-NiTe <sub>2</sub> with V <sub>Ni</sub> , $\theta = 1/27$ , $q = 0$ e/atom       |
| 11  | 3VNi-min.mpg     | Monolayer 1T-NiTe <sub>2</sub> with V <sub>Ni</sub> , $\theta = 1/27$ , $q = -0.077$ e/atom  |
| 12  | 3VNi-max.mpg     | Monolayer 1T-NiTe <sub>2</sub> with V <sub>Ni</sub> , $\theta = 1/27$ , $q = +0.077$ e/atom  |
| 13  | 3VTeL.mpg        | Monolayer 1T-NiTe <sub>2</sub> with V <sub>TeL</sub> , $\theta = 1/27$ , $q = 0$ e/atom      |
| 14  | 3VTeL-min.mpg    | Monolayer 1T-NiTe <sub>2</sub> with V <sub>TeL</sub> , $\theta = 1/27$ , $q = -0.077$ e/atom |
| 15  | 3VTeL-max.mpg    | Monolayer 1T-NiTe <sub>2</sub> with V <sub>TeL</sub> , $\theta = 1/27$ , $q = +0.077$ e/atom |
| 16  | 3VTeH.mpg        | Monolayer 1T-NiTe <sub>2</sub> with V <sub>TeH</sub> , $\theta = 1/27$ , $q = 0$ e/atom      |
| 17  | 3VTeH-min.mpg    | Monolayer 1T-NiTe <sub>2</sub> with V <sub>TeH</sub> , $\theta = 1/27$ , $q = -0.077$ e/atom |
| 18  | 3VTeH-max.mpg    | Monolayer 1T-NiTe <sub>2</sub> with V <sub>TeH</sub> , $\theta = 1/27$ , $q = +0.077$ e/atom |
